# Supplementary material for: Vitamin E Increases Antimicrobial Sensitivity by Inhibiting Bacterial Lipocalin Antibiotic Binding
Source: PubMed Central journal article supplement (PMC6291622; doi:10.1128/msphere.00564-18), 2018-12-12
Supplement: sph006182724st1.pdf [file sph006182724st1.pdf]

**Table S1. Primers used in this study**

| <b>Target Gene or Intergenic region</b> | <b>Sequence</b>           | <b>Sense</b> | <b>Product Length</b> |
|-----------------------------------------|---------------------------|--------------|-----------------------|
| BACL 3310                               | GGCACGATCAAGTTCGACGG      | Forward      | 189                   |
|                                         | GTAGTCGAGGCCGAAATCGT      | Reverse      |                       |
| BCAL 3311                               | ACAAGTACAACGTGACCGGC      | Forward      | 167                   |
|                                         | GATCGACGTGTCCTTCCACT      | Reverse      |                       |
| BCAL 3312                               | CGAACATCCCGGTCGTCTAT      | Forward      | 200                   |
|                                         | AAAGGGAAGCATGCGCGAC       | Reverse      |                       |
| BCAL 3310-11                            | CTCGCGGCGCTCAAG           | Forward      | 142                   |
|                                         | GACGCGACAAGCGCC           | Reverse      |                       |
| BCAL 3311-12                            | CGGACGAAGTGCAGATCAAG<br>T | Forward      | 171                   |
|                                         | AAAGCCGAGAACGACAGCGA      | Reverse      |                       |
| 16S Control                             | TATAATCAGCCGCCACGGCA      | Reverse      | 195                   |
|                                         | GTAAGCGTGCGTAGGTGGT       | Forward      |                       |
|                                         | CTTTCGTGCCTCAGTGTCAG      | Reverse      |                       |
