# Supplementary material for: Vitamin E Increases Antimicrobial Sensitivity by Inhibiting Bacterial Lipocalin Antibiotic Binding
Source: PubMed Central journal article supplement (PMC6291622; doi:10.1128/msphere.00564-18), 2018-12-12
Supplement: sph006182724st2.pdf [file sph006182724st2.pdf]

**Table S2. Bacterial strains and plasmids**

| Strains or plasmid                     | Relevant Characteristics <sup>a</sup>                                                | Sources and/or reference <sup>b</sup> |
|----------------------------------------|--------------------------------------------------------------------------------------|---------------------------------------|
| <b>Strains</b>                         |                                                                                      |                                       |
| <b><i>Burkholderia cenocepacia</i></b> |                                                                                      |                                       |
| K56-2                                  | ET12 clone related to J2315, CF clinical isolate                                     | BCRRC <sup>c</sup> (1)                |
| $\Delta bcnA$                          | OME62, Deletion of <i>bcnA</i> gene in K56-2                                         | (2)                                   |
| $\Delta bcnB$                          | OME65, Deletion of <i>bcnB</i> gene in K56-2                                         | (2)                                   |
| $\Delta bcnAB$                         | OME4, Deletion of <i>bcnA</i> and <i>bcnB</i> in K56-2                               | (3)                                   |
| $\Delta bcoA$                          | OME63, Deletion of <i>bcoA</i> gene in K56-2                                         | (2)                                   |
| $\Delta bcnAB \Delta bcoA$             | OME64, Deletion of <i>bcnA</i> , <i>bcnB</i> and <i>bcoA</i> in K56-2                | (2)                                   |
| $\Delta bcnA$ pDA17                    | MMN1, K56-2 $\Delta bcnA$ carrying pDA17; Tet <sup>R</sup>                           | This study                            |
| $\Delta bcnAB$ pDA17                   | MMN2, K56-2 $\Delta bcnB$ carrying pDA17; Tet <sup>R</sup>                           | This study                            |
| $\Delta bcnAB \Delta bcoA$ pDA17       | MMN3, K56-2 $\Delta bcnAB \Delta bcoA$ carrying pDA17; Tet <sup>R</sup>              | This study                            |
| $\Delta bcnA pbcnA$                    | OME86, K56-2 $\Delta bcnA$ carrying <i>bcnA</i> cloned in pDA17; Tet <sup>R</sup>    | (2)                                   |
| $\Delta bcnAB pbcnA$                   | MMN4, K56-2 $\Delta bcnA$ carrying <i>bcnA</i> cloned in pDA17; Tet <sup>R</sup>     | This study                            |
| $\Delta bcnAB \Delta bcoA pbcnA$       | MMN5, K56-2 $\Delta bcnA$ carrying <i>bcnA</i> cloned in pDA17; Tet <sup>R</sup>     | This study                            |
| <b><i>Pseudomonas aeruginosa</i></b>   |                                                                                      |                                       |
| PAO1                                   | Non-CF clinical isolate                                                              | (4)                                   |
| <b>Plasmids</b>                        |                                                                                      |                                       |
| pDA17                                  | ori <sub>pBBRI</sub> , Tet <sup>R</sup> , mob+, P <sub>dhfr</sub> , FLAG epitope     | (5)                                   |
| pExp <i>bcnA</i>                       | POE16, <i>bcnA</i> gene without signal peptide encoding sequence cloned in pET28a(+) | (3)                                   |
| <i>pbcnA</i>                           | pOE13, pDA17 harboring <i>bcnA</i> gene C-terminus FLAG, Tet <sup>R</sup>            | (2)                                   |

<sup>a</sup>Tet<sup>R</sup>, Tetracycline resistance.

<sup>b</sup>References are listed in the main manuscript.

<sup>c</sup>BCRRC, *B. cepacia* Research and Referral Repository for Canadian CF Clinics.

## References

1. Mahenthalingam E, Coenye T, Chung JW, Speert DP, Govan JR, Taylor P, Vandamme P. 2000. Diagnostically and experimentally useful panel of strains from the *Burkholderia cepacia* complex. J Clin Microbiol 38:910-913.
2. El-Halfawy OM, Klett J, Ingram RJ, Loutet SA, Murphy ME, Martin-Santamaria S, Valvano MA. 2017. Antibiotic Capture by Bacterial Lipocalins Uncovers an Extracellular Mechanism of Intrinsic Antibiotic Resistance. MBio 8.
3. El-Halfawy OM, Valvano MA. 2013. Chemical communication of antibiotic resistance by a highly resistant subpopulation of bacterial cells. PLoS One 8:e68874.
4. Holloway BW. 1955. Genetic recombination in *Pseudomonas aeruginosa*. J Gen Microbiol 13:572-581.

5. Andrade A, Valvano MA. 2014. A *Burkholderia cenocepacia* gene encoding a non-functional tyrosine phosphatase is required for the delayed maturation of the bacteria-containing vacuoles in macrophages. *Microbiology* 160:1332-1345.
